# Supplementary material for: Two-step one-pot synthesis of dihydropyrazinones as Xaa-Ser dipeptide isosteres through morpholine acetal rearrangement
Source: Royal Society of Chemistry journal article supplement (doi:10.1039/c5ob00783f), 2015-01-01
Supplement: c5ob00783f1.pdf [file c5ob00783f1.pdf]

## One-pot synthesis of dihydropyrazinones as Xaa-Ser dipeptide isosteres through morpholine acetal rearrangement

Elena Lenci,<sup>a</sup> Riccardo Innocenti,<sup>a</sup> Gloria Menchi,<sup>a,b</sup> Cristina Faggi,<sup>a</sup> and Andrea Trabocchi\*<sup>a,b</sup>

<sup>a</sup> Department of Chemistry "Ugo Schiff", University of Florence, Via della Lastruccia 13, 50019, Sesto Fiorentino, Florence, Italy

<sup>b</sup> Interdepartmental Center for Preclinical Development of Molecular Imaging (CISPIM), University of Florence

### ELECTRONIC SUPPLEMENTARY INFORMATION

<sup>1</sup>H and <sup>13</sup>C NMR spectra for compounds **2a–9**, **2b** and **2d**

S2-S11

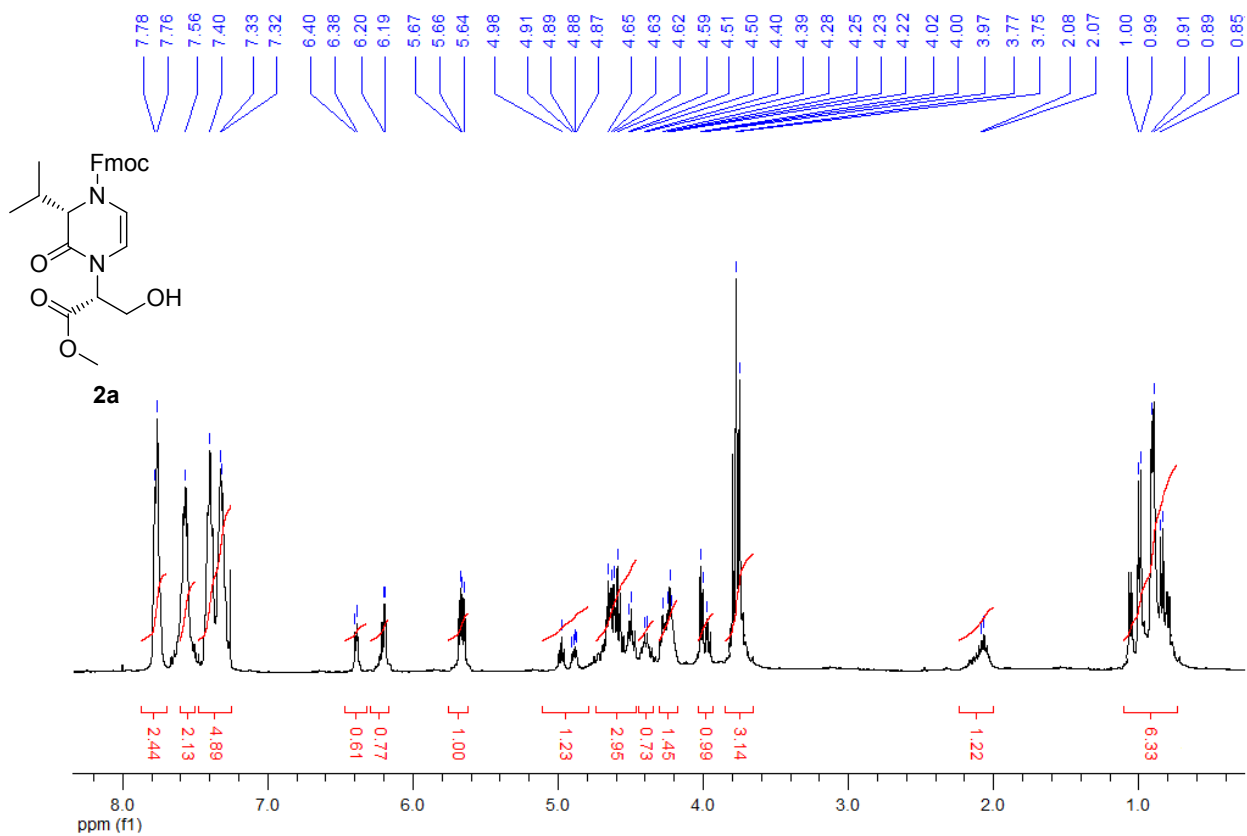

Figure S1. <sup>1</sup>H NMR spectrum of compound **2a** (400 MHz, CDCl<sub>3</sub>).

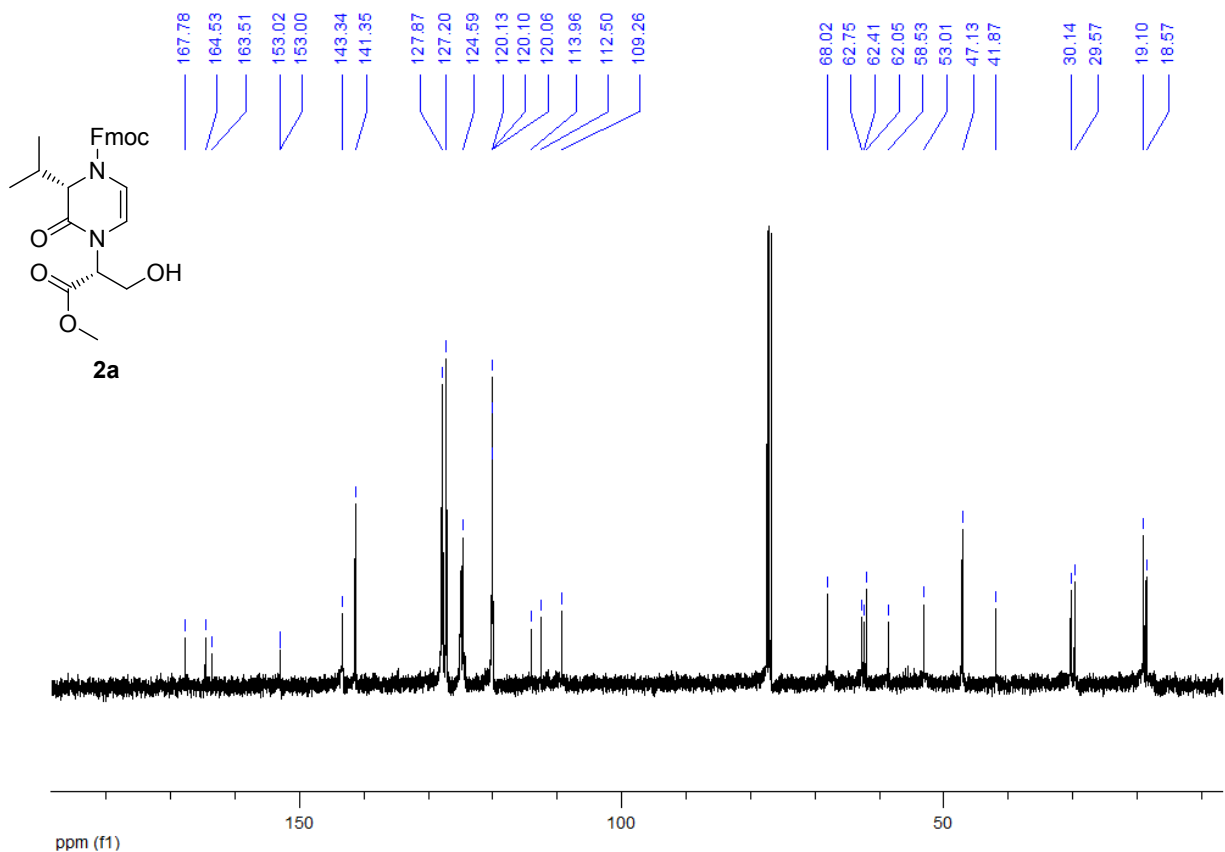

Figure S2. <sup>13</sup>C NMR spectrum of compound **2a** (50 MHz, CDCl<sub>3</sub>).

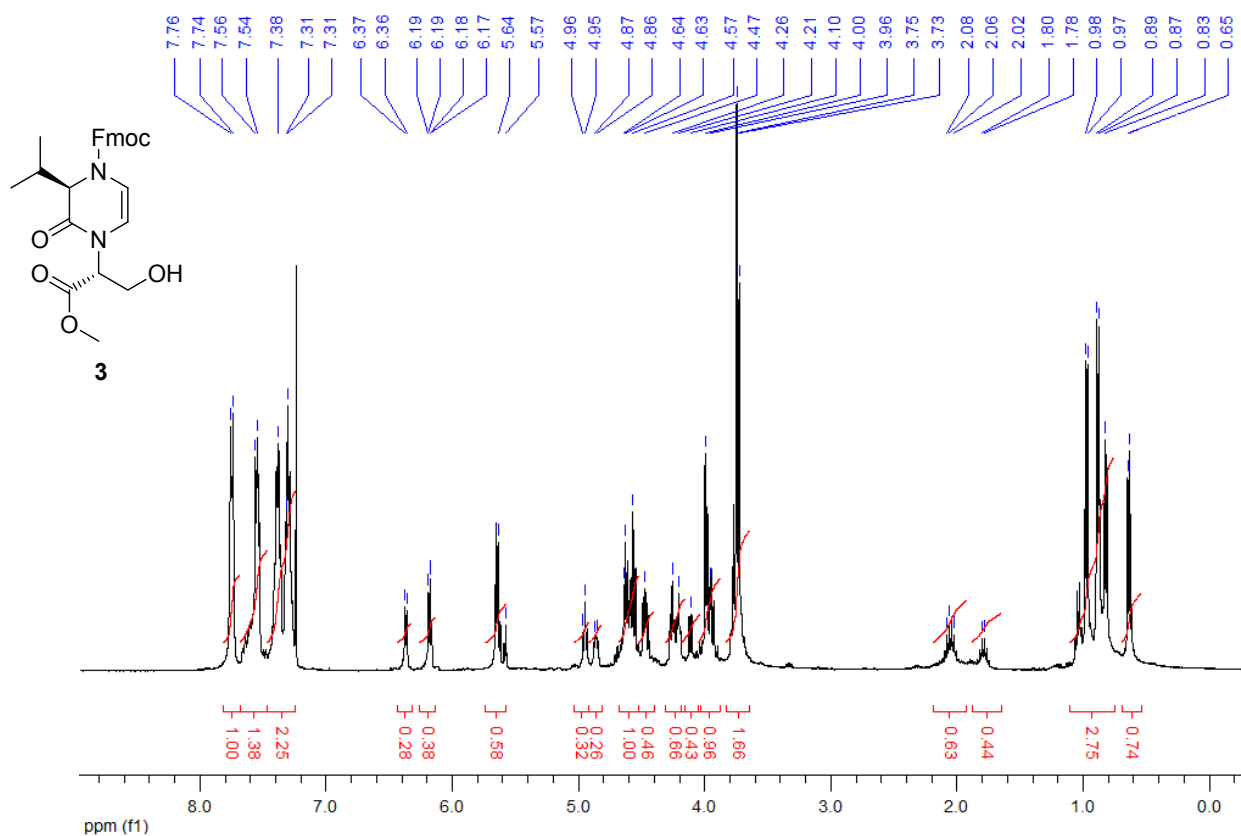

Figure S3. <sup>1</sup>H NMR spectrum of compound **3** (400 MHz, CDCl<sub>3</sub>).

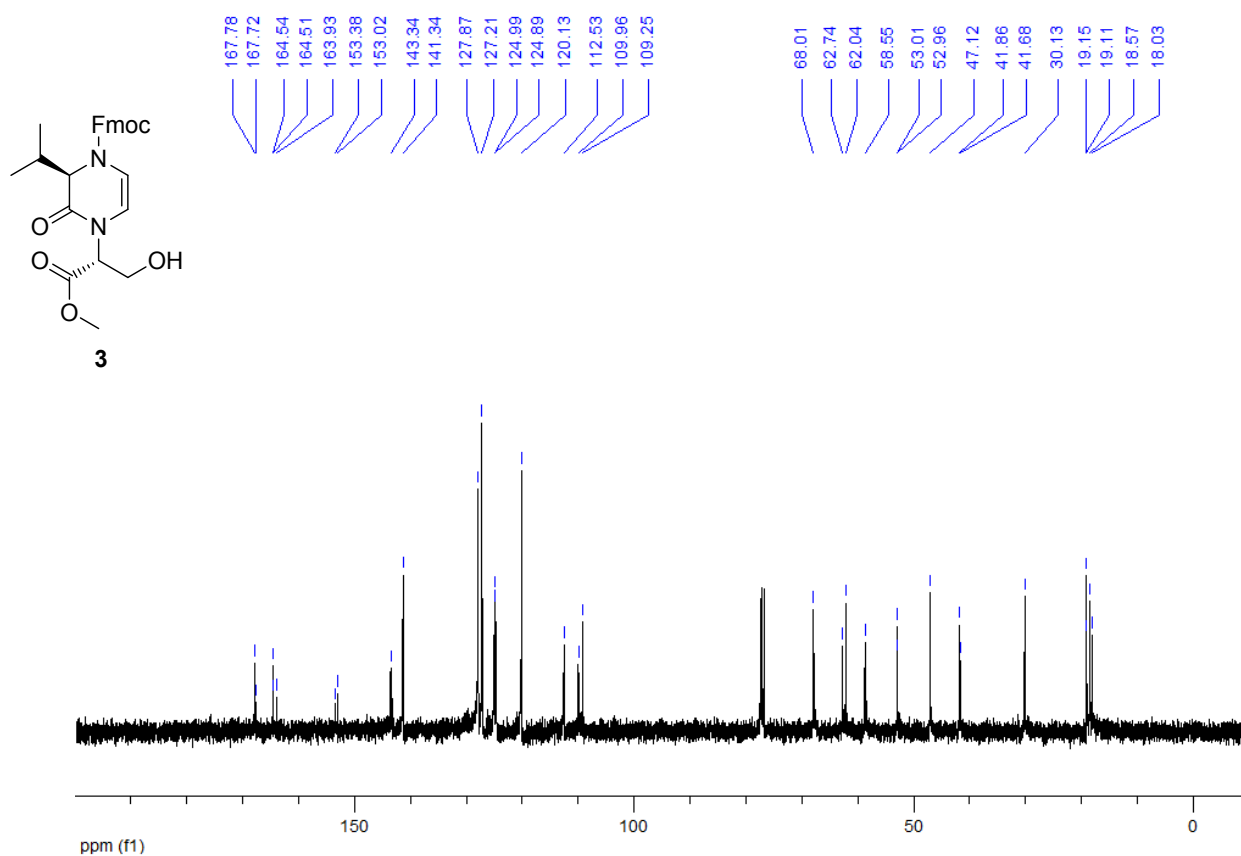

Figure S4. <sup>13</sup>C NMR spectrum of compound **3** (100 MHz, CDCl<sub>3</sub>).

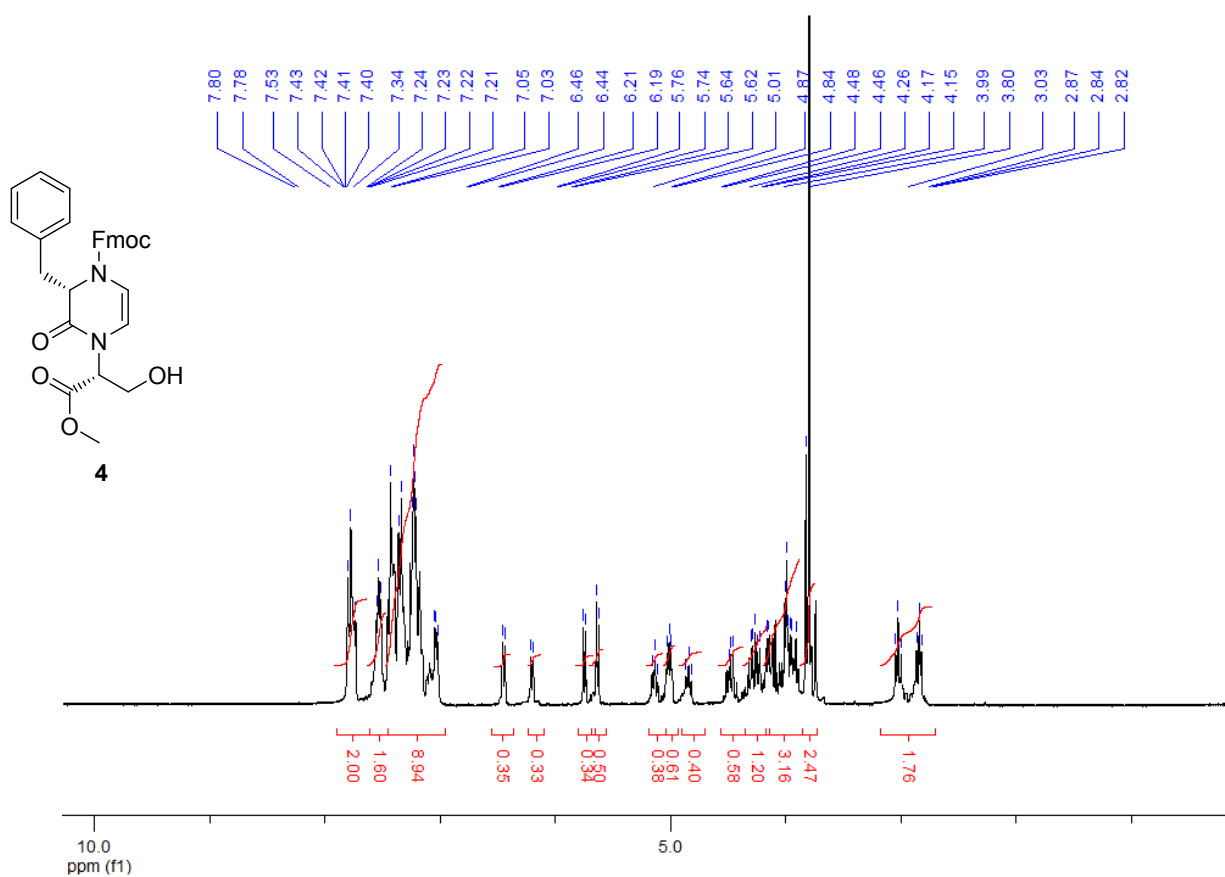

Figure S5.  $^1\text{H}$  NMR spectrum of compound 4 (400 MHz,  $\text{CDCl}_3$ ).

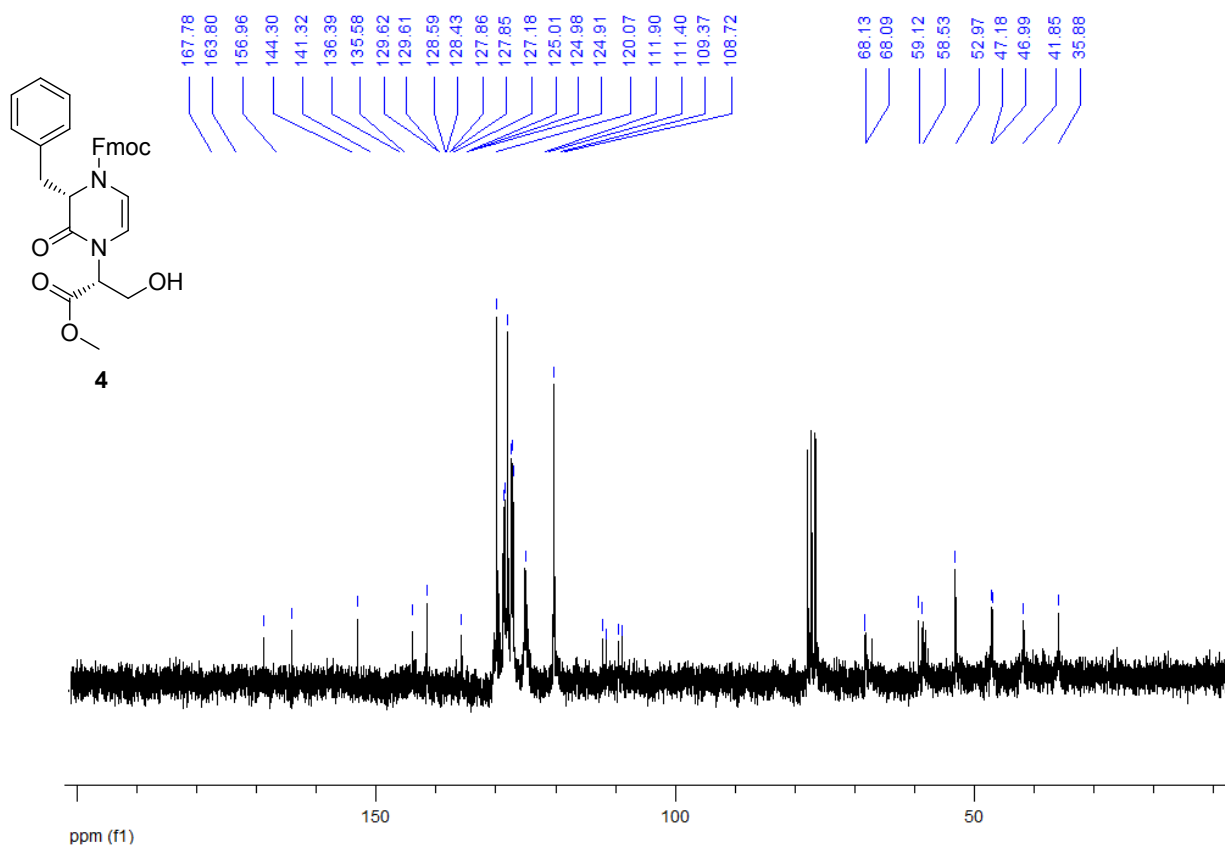

Figure S6.  $^{13}\text{C}$  NMR spectrum of compound 4 (50 MHz,  $\text{CDCl}_3$ ).

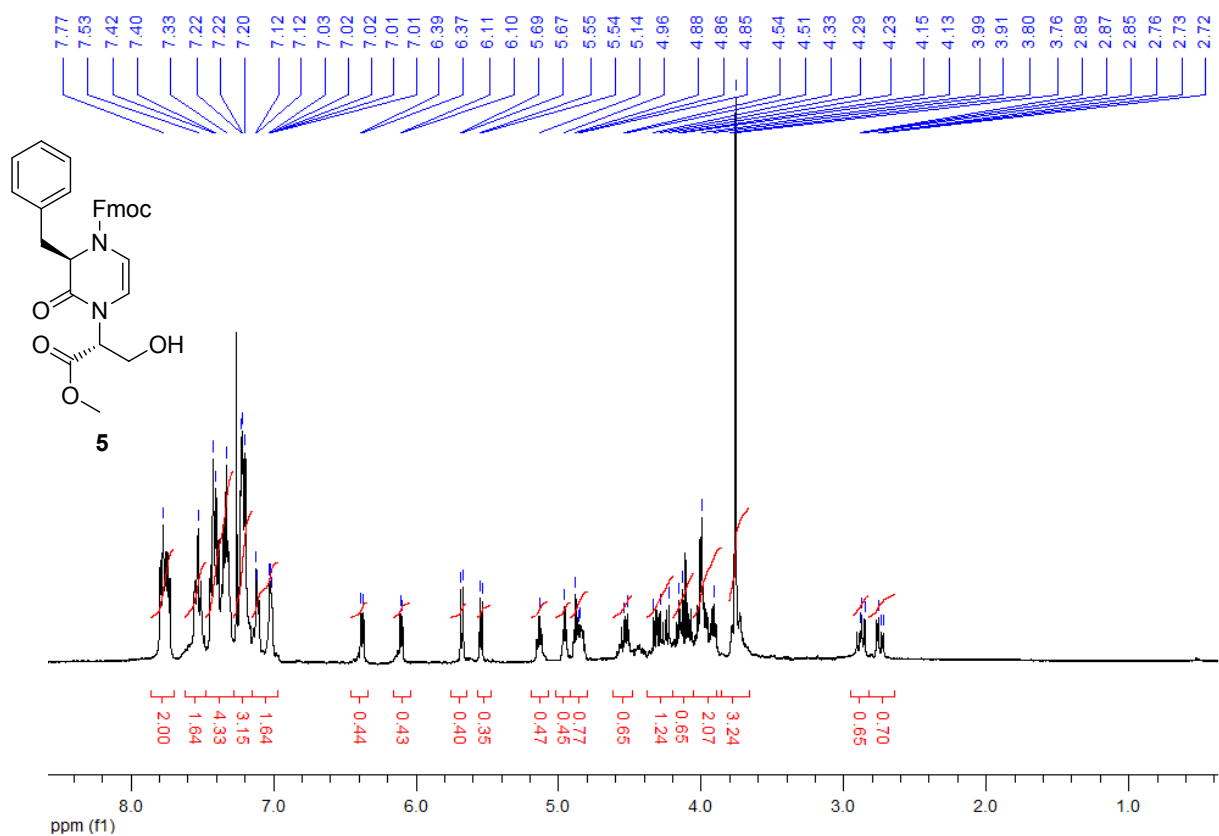

Figure S7. <sup>1</sup>H NMR spectrum of compound **5** (400 MHz, CDCl<sub>3</sub>).

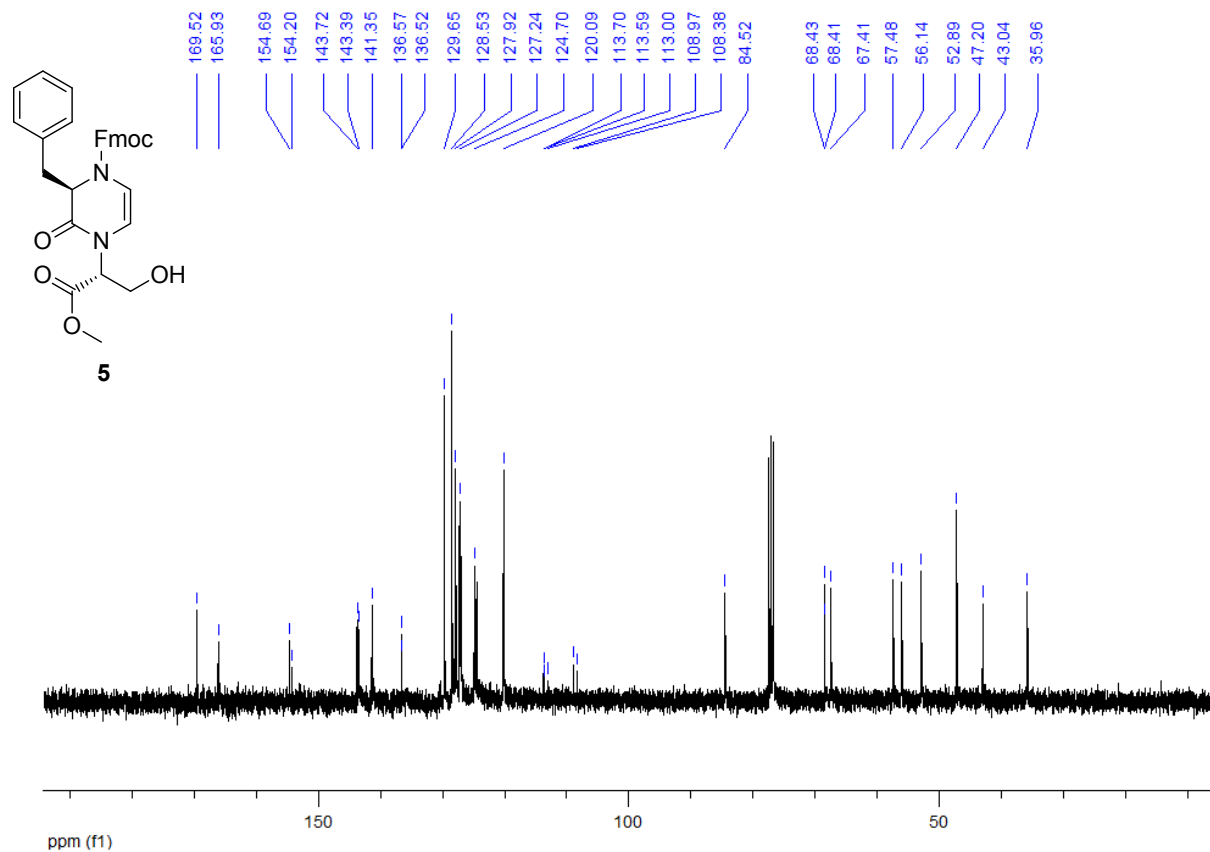

Figure S8. <sup>13</sup>C NMR spectrum of compound **5** (100 MHz, CDCl<sub>3</sub>).

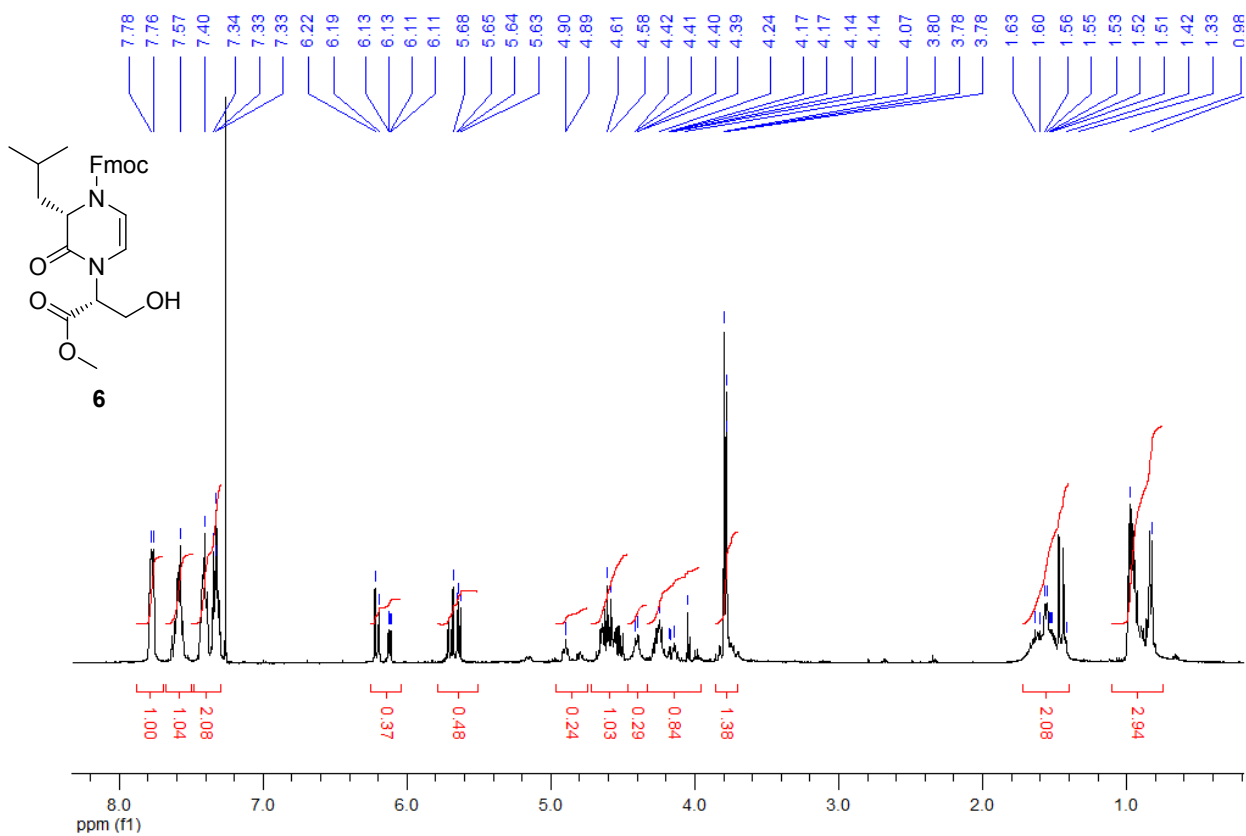

Figure S9. <sup>1</sup>H NMR spectrum of compound **6** (400 MHz, CDCl<sub>3</sub>).

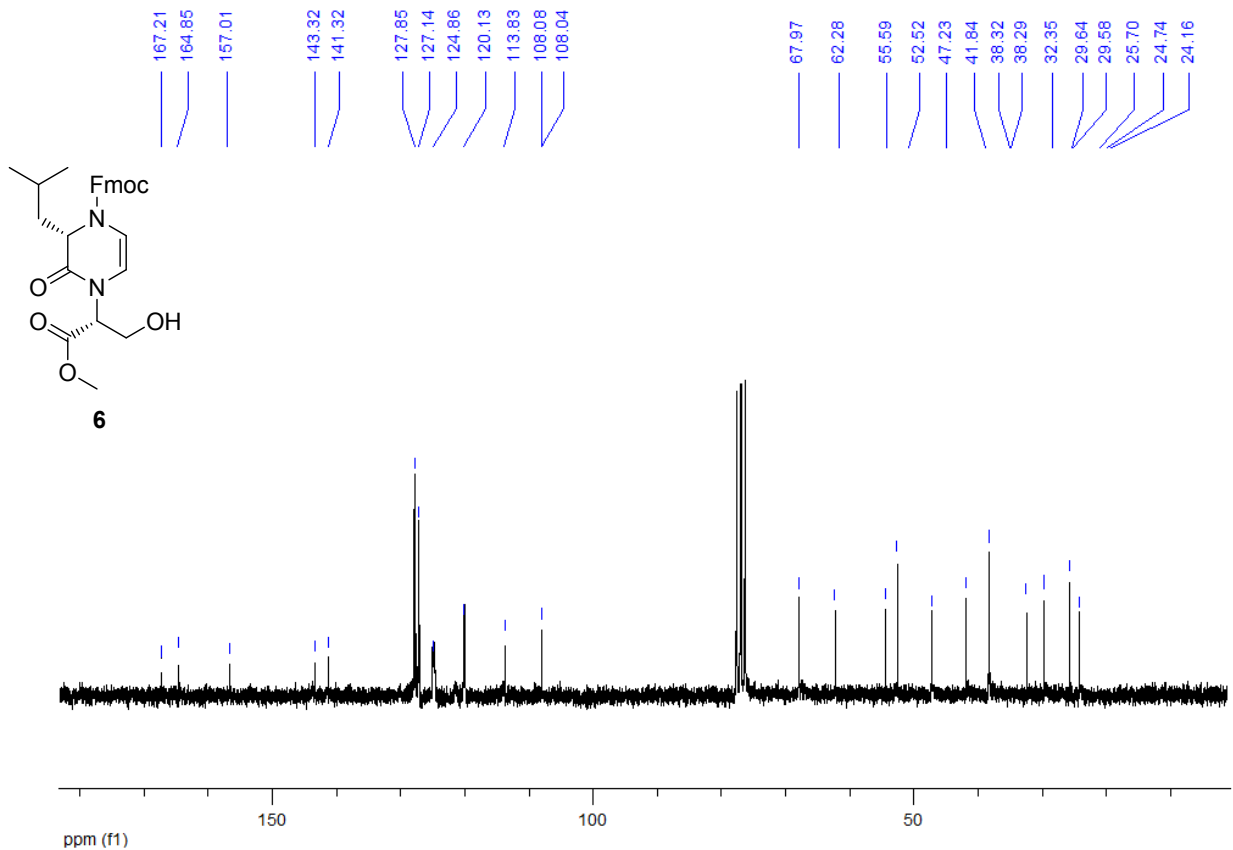

Figure S10. <sup>13</sup>C NMR spectrum of compound **6** (50 MHz, CDCl<sub>3</sub>).

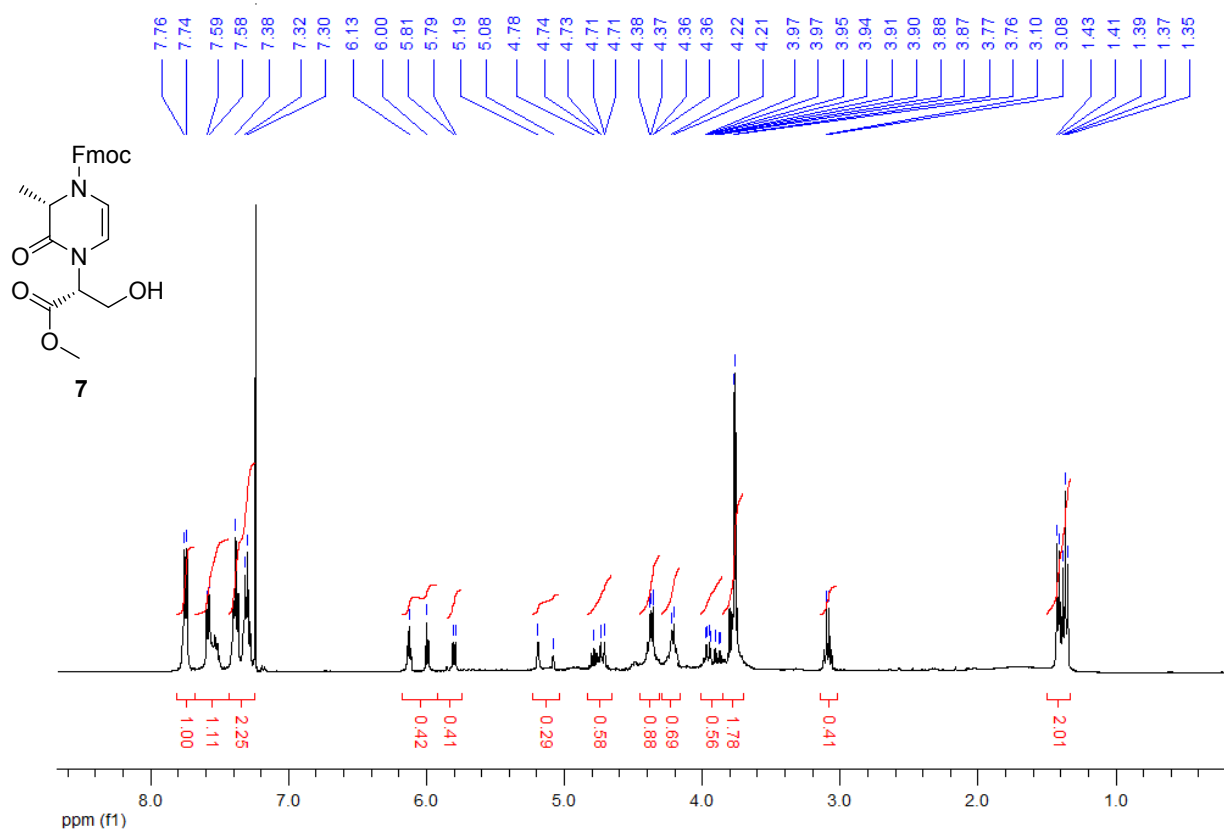

Figure S11. <sup>1</sup>H NMR spectrum of compound VI (400 MHz, CDCl<sub>3</sub>).

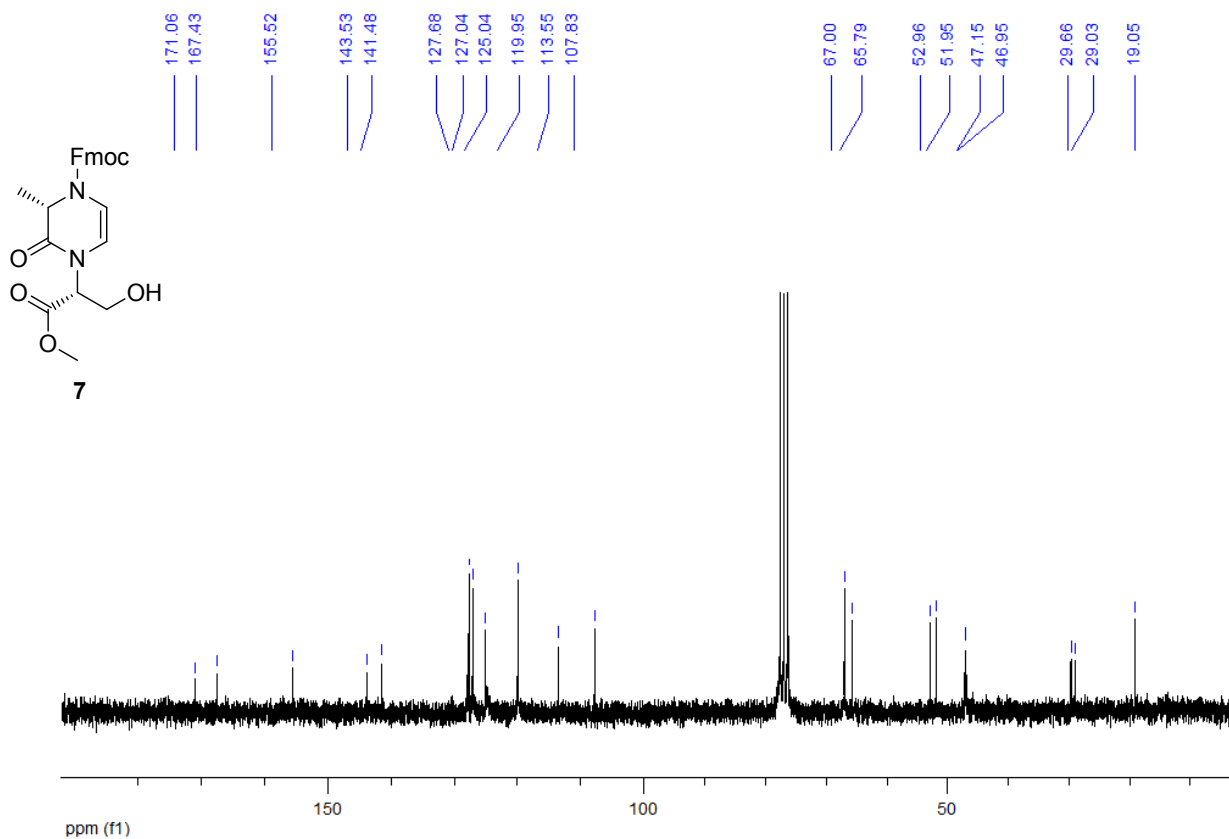

Figure S12. <sup>13</sup>C NMR spectrum of compound 7 (50 MHz, CDCl<sub>3</sub>).

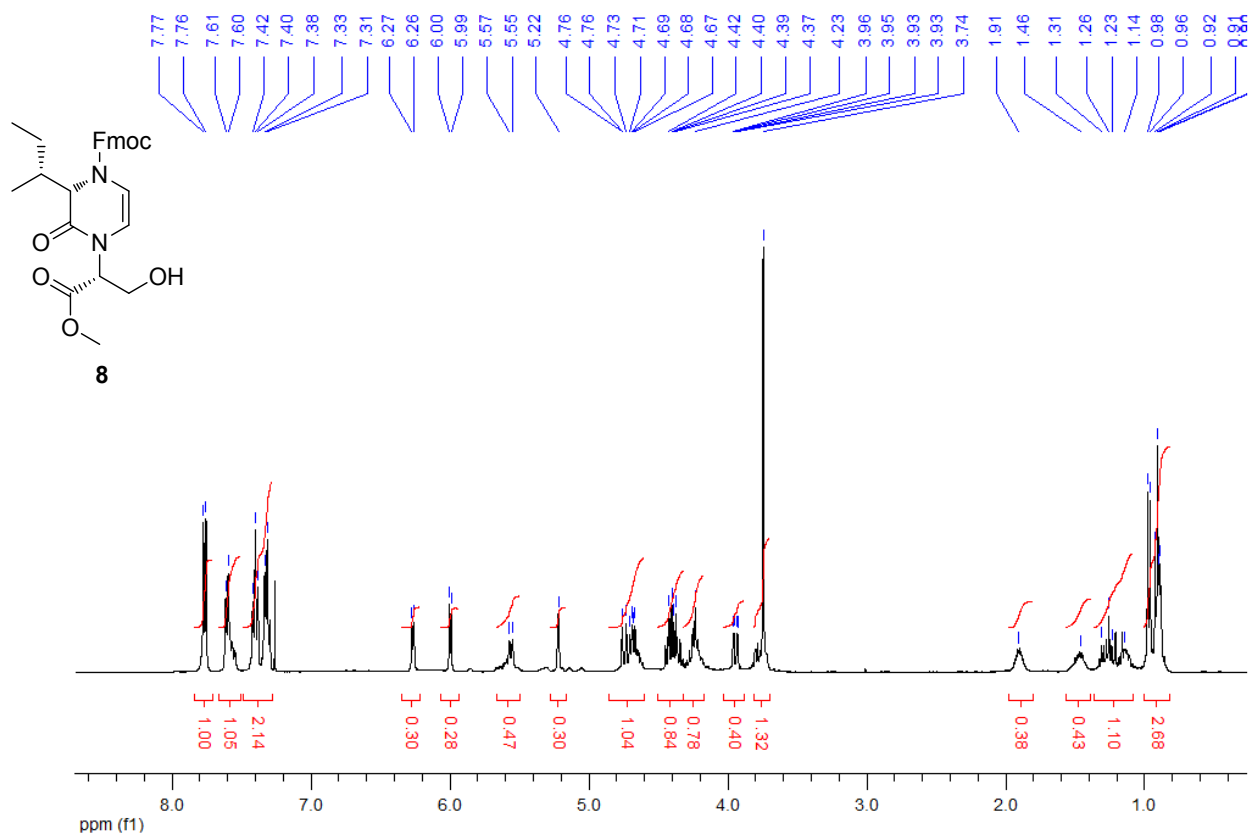

Figure S13. <sup>1</sup>H NMR spectrum of compound **8** (400 MHz, CDCl<sub>3</sub>).

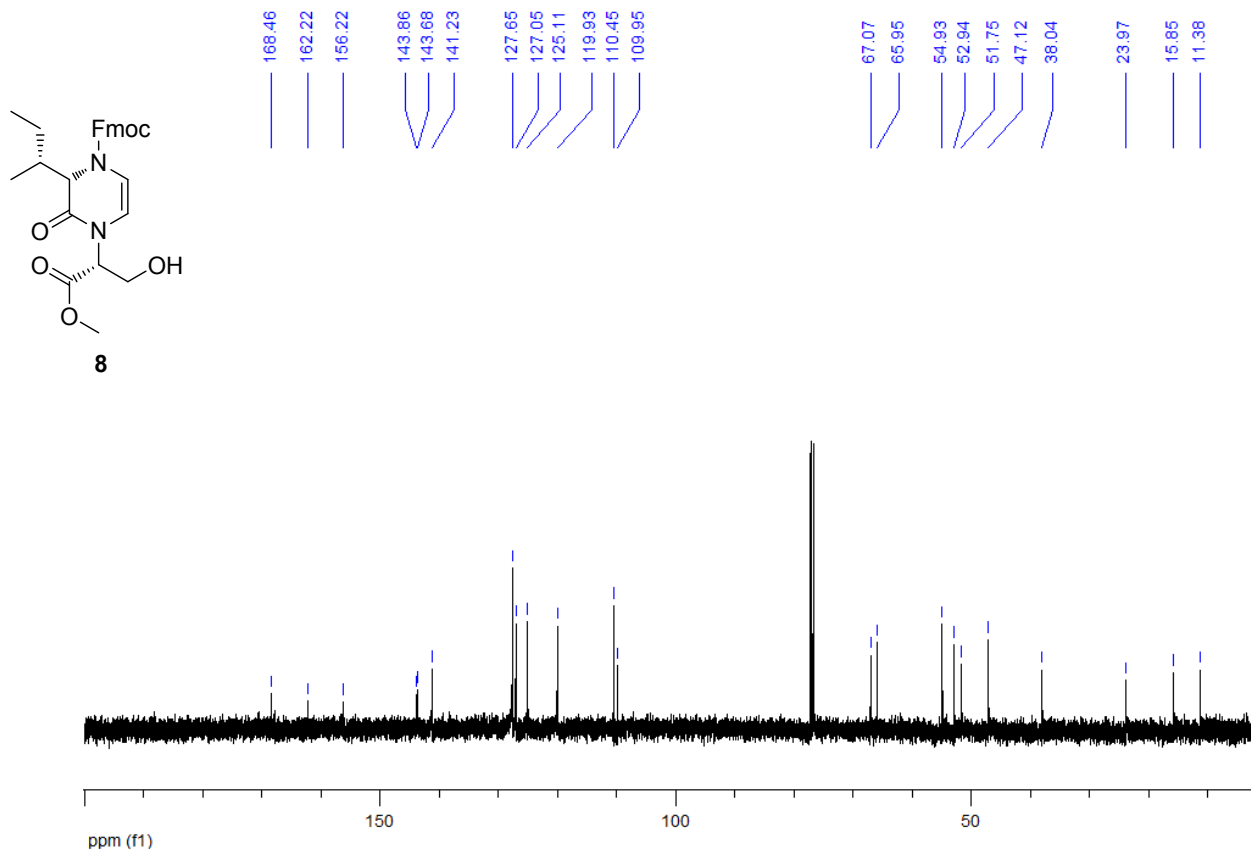

Figure S14. <sup>13</sup>C NMR spectrum of compound **8** (100 MHz, CDCl<sub>3</sub>).



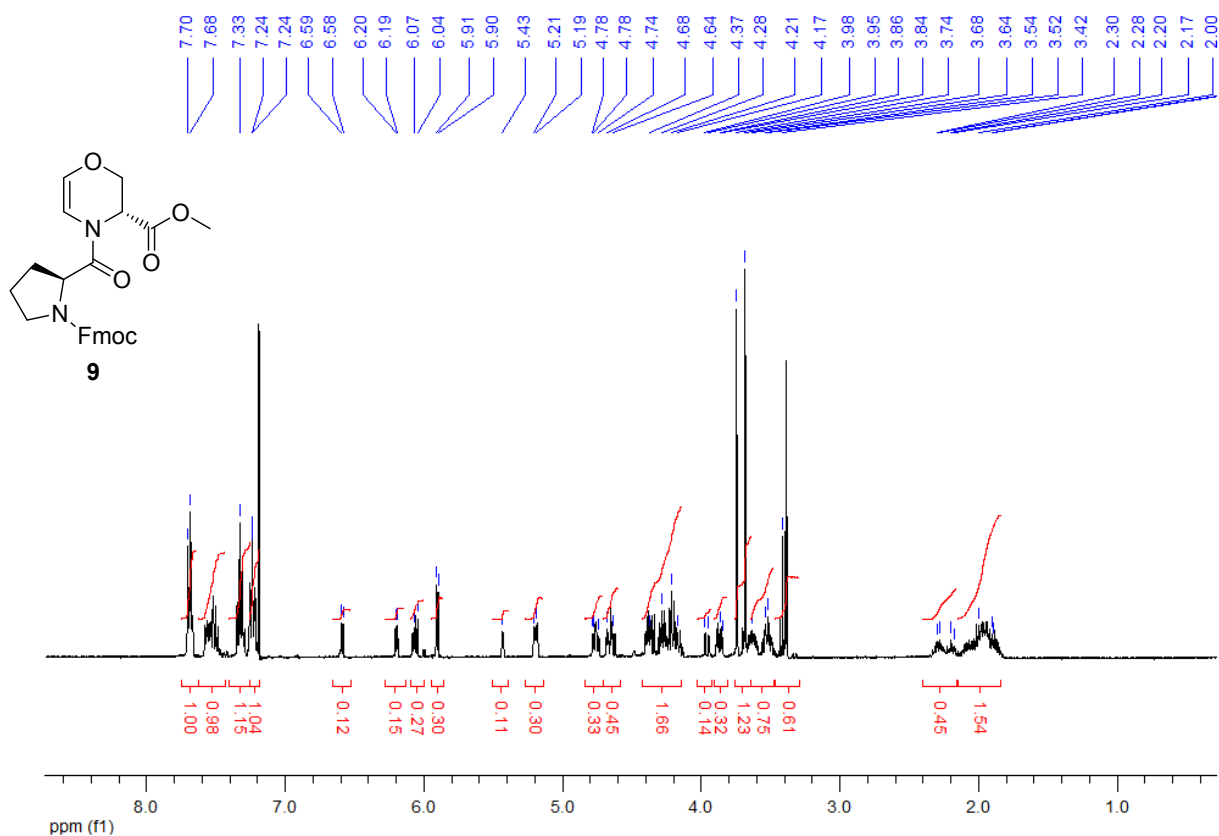

Figure S15. <sup>1</sup>H NMR spectrum of compound **9** (400 MHz, CDCl<sub>3</sub>).

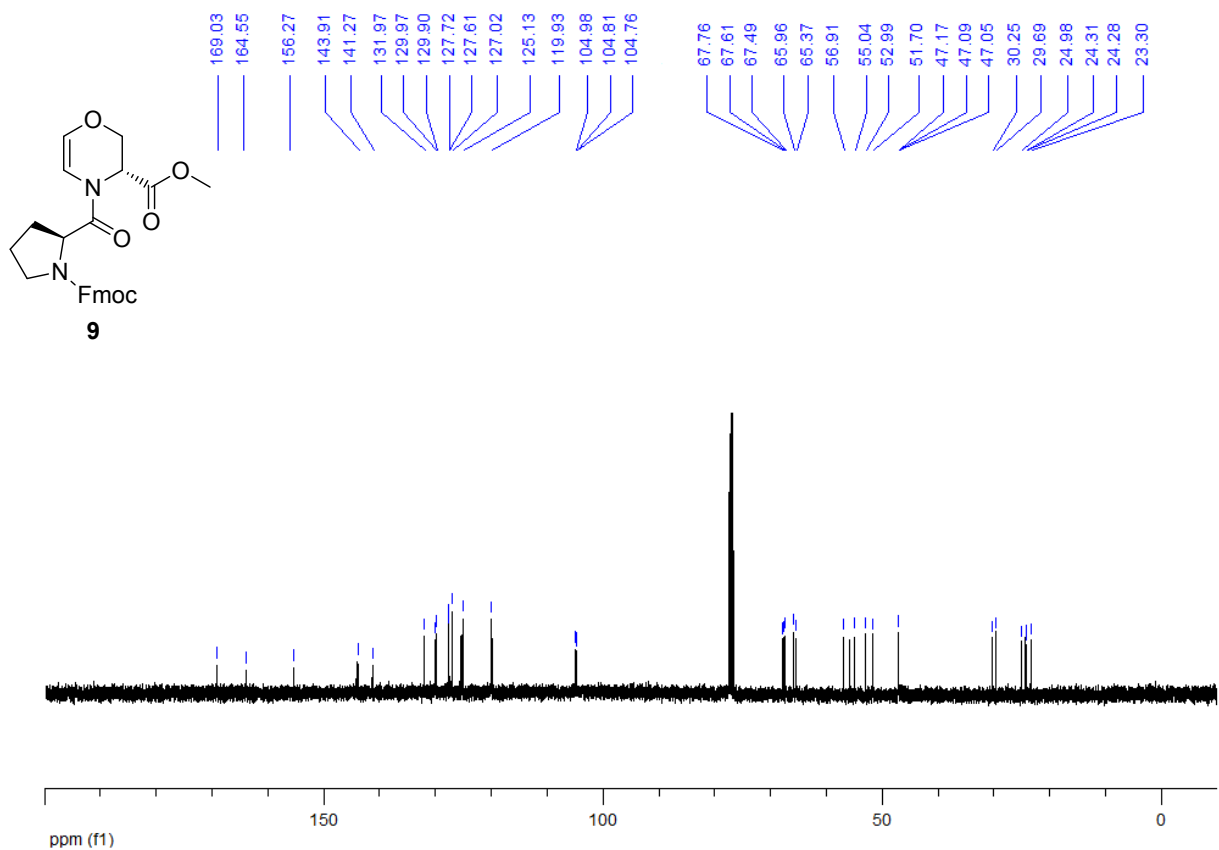

Figure S16. <sup>13</sup>C NMR spectrum of compound **9** (100 MHz, CDCl<sub>3</sub>).

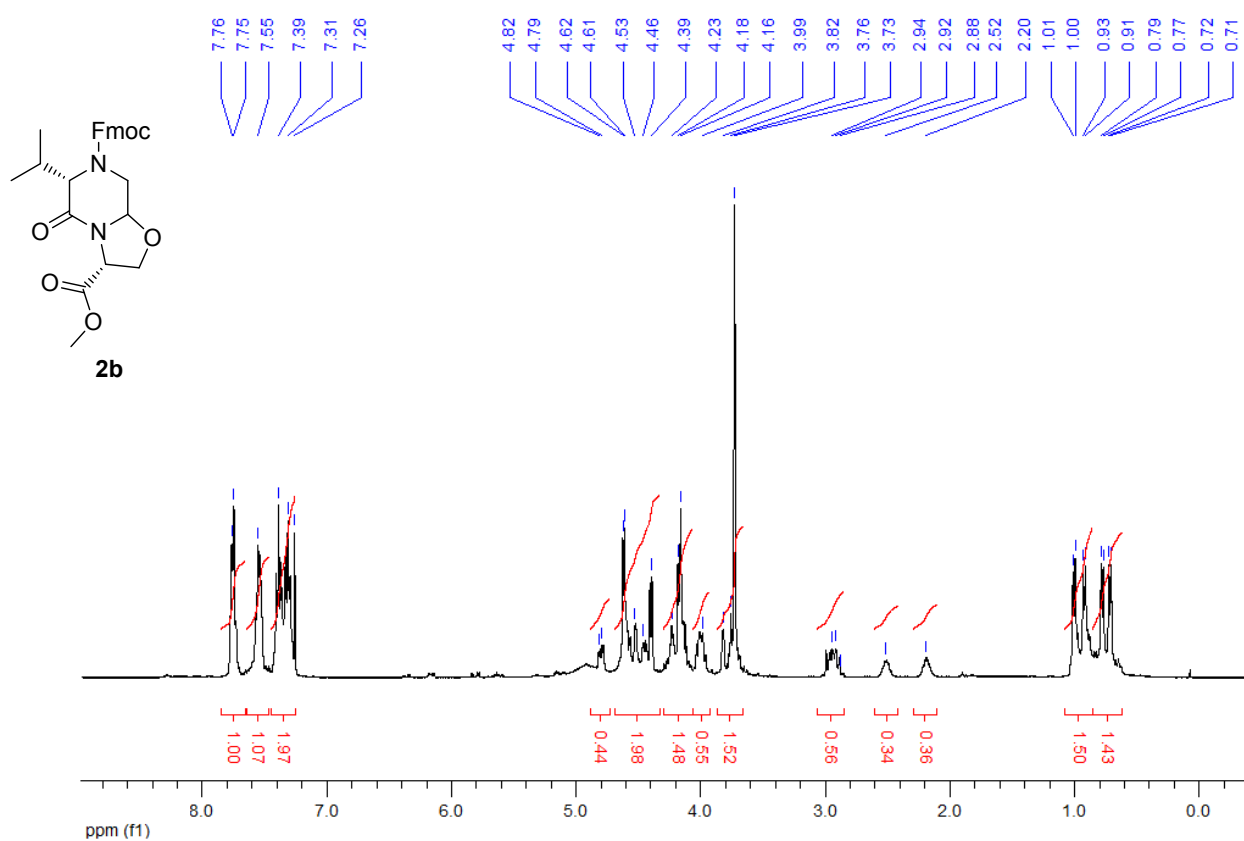

Figure S17. <sup>1</sup>H NMR spectrum of compound **2b** (400 MHz, CDCl<sub>3</sub>).

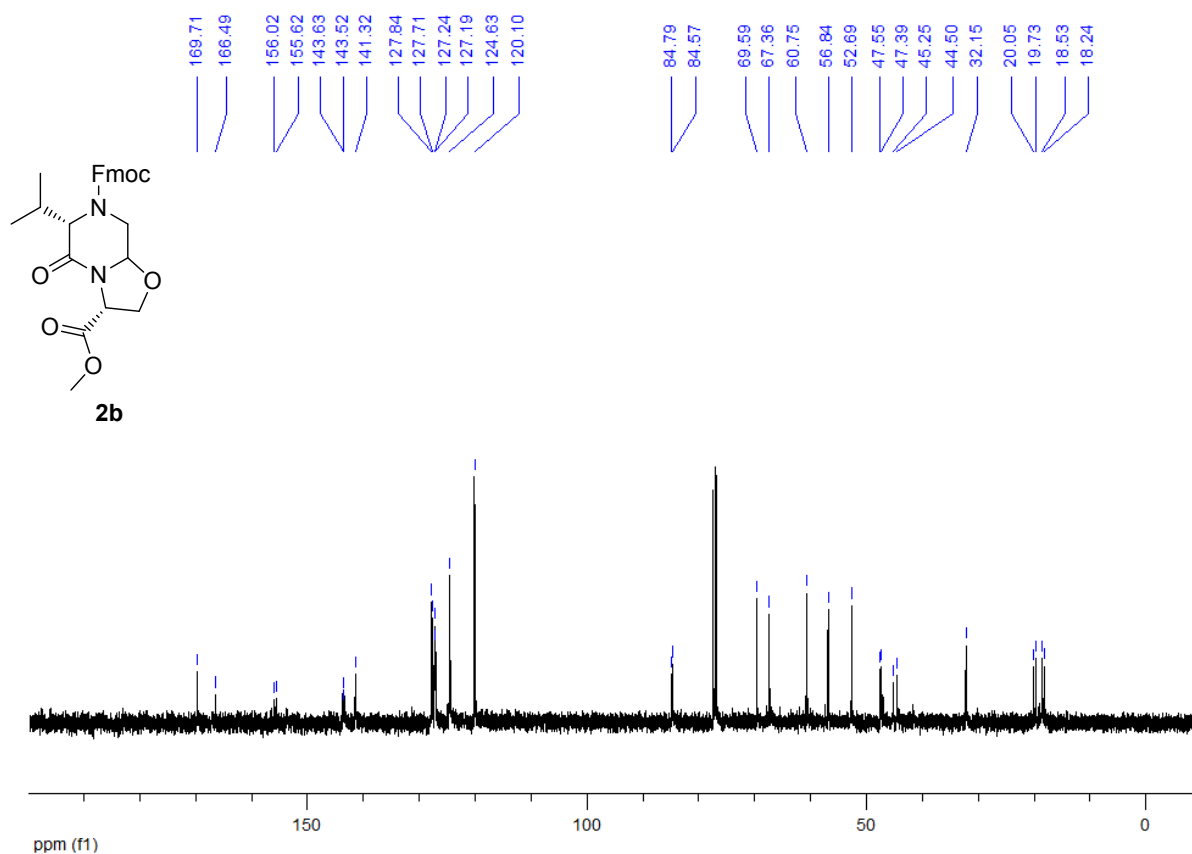

Figure S18. <sup>13</sup>C NMR spectrum of compound **2c** (100 MHz, CDCl<sub>3</sub>).

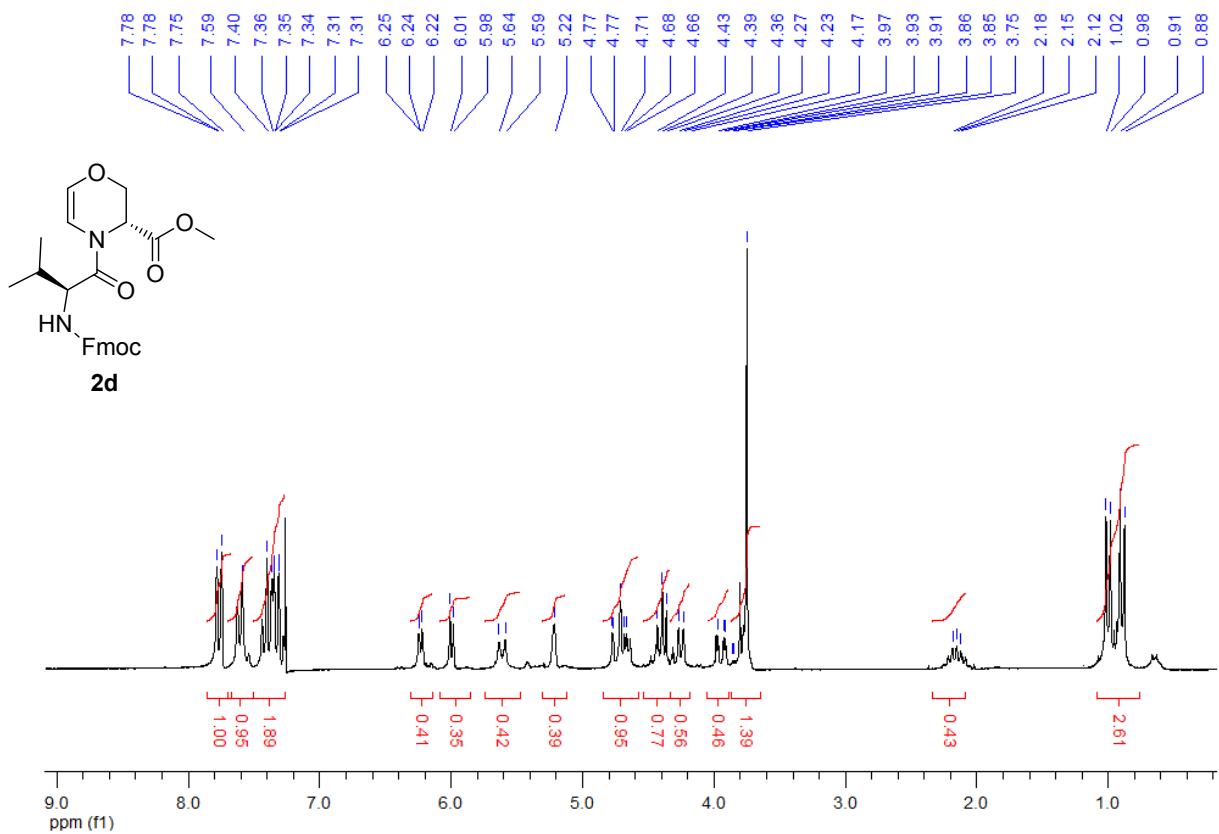

Figure S19. <sup>1</sup>H NMR spectrum of compound **2d** (400 MHz, CDCl<sub>3</sub>).

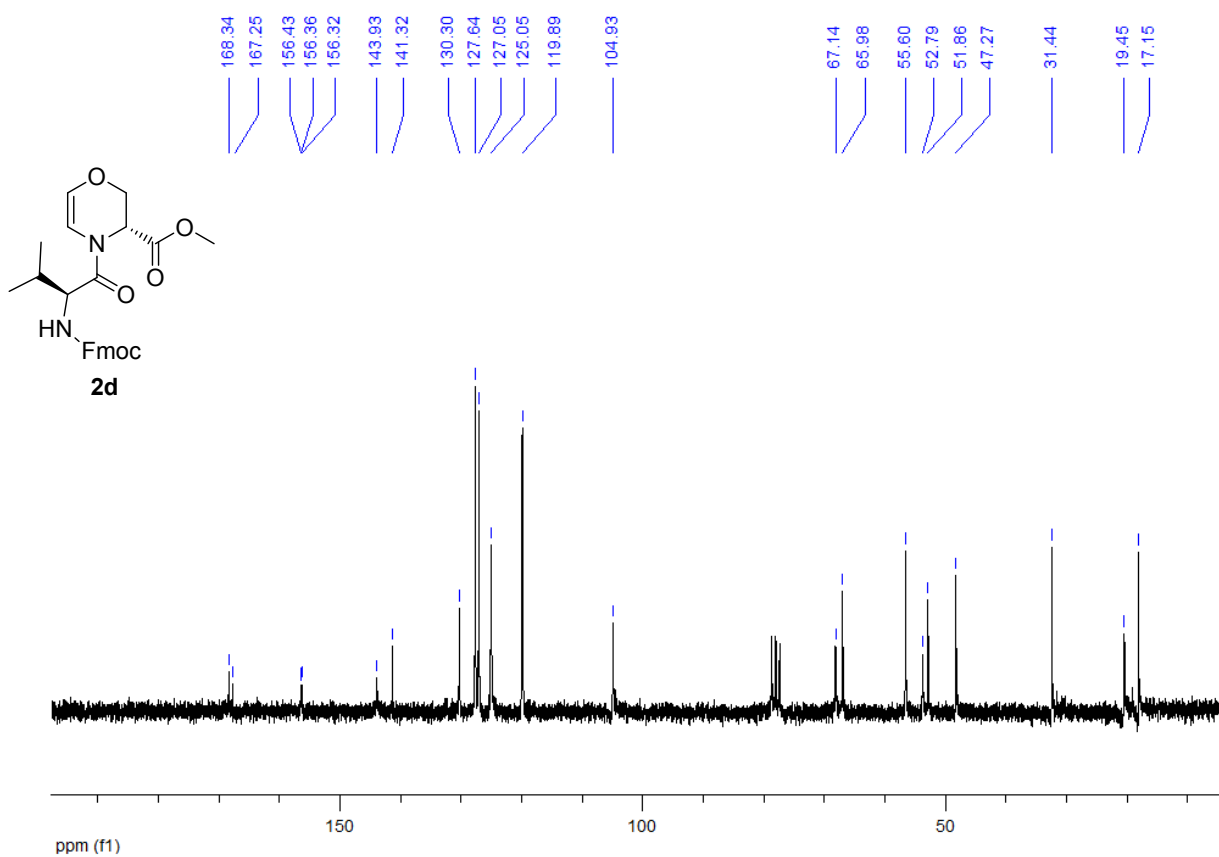

Figure S20. <sup>13</sup>C NMR spectrum of compound **2d** (100 MHz, CDCl<sub>3</sub>).
